# Supplementary material for: Stress gates an astrocytic energy reservoir to impair synaptic plasticity
Source: PubMed Central journal article supplement (PMC7181611; doi:10.1038/s41467-020-15778-9), 2020-04-24
Supplement: 41467_2020_15778_MOESM1_ESM.pdf [file 41467_2020_15778_MOESM1_ESM.pdf]

### Supplementary Figure 1

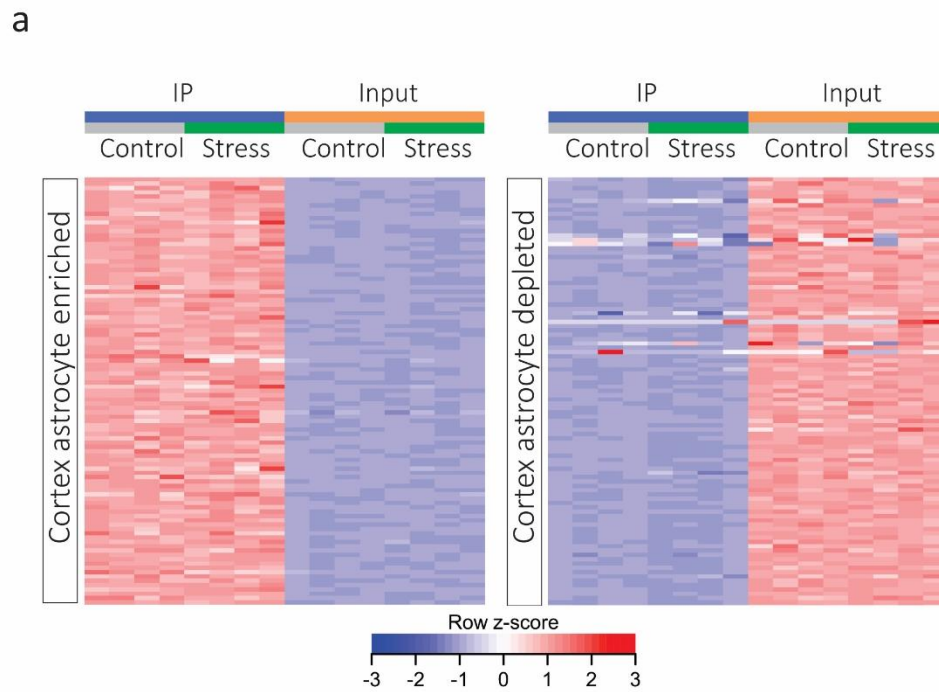

**(a)** Heat map, depicting changes in astrocyte enriched and astrocyte depleted genes in total RNA (INPUT) as well as specifically in astrocytes (IP) in naïve (control) and stress conditions.

## Supplementary Figure 2

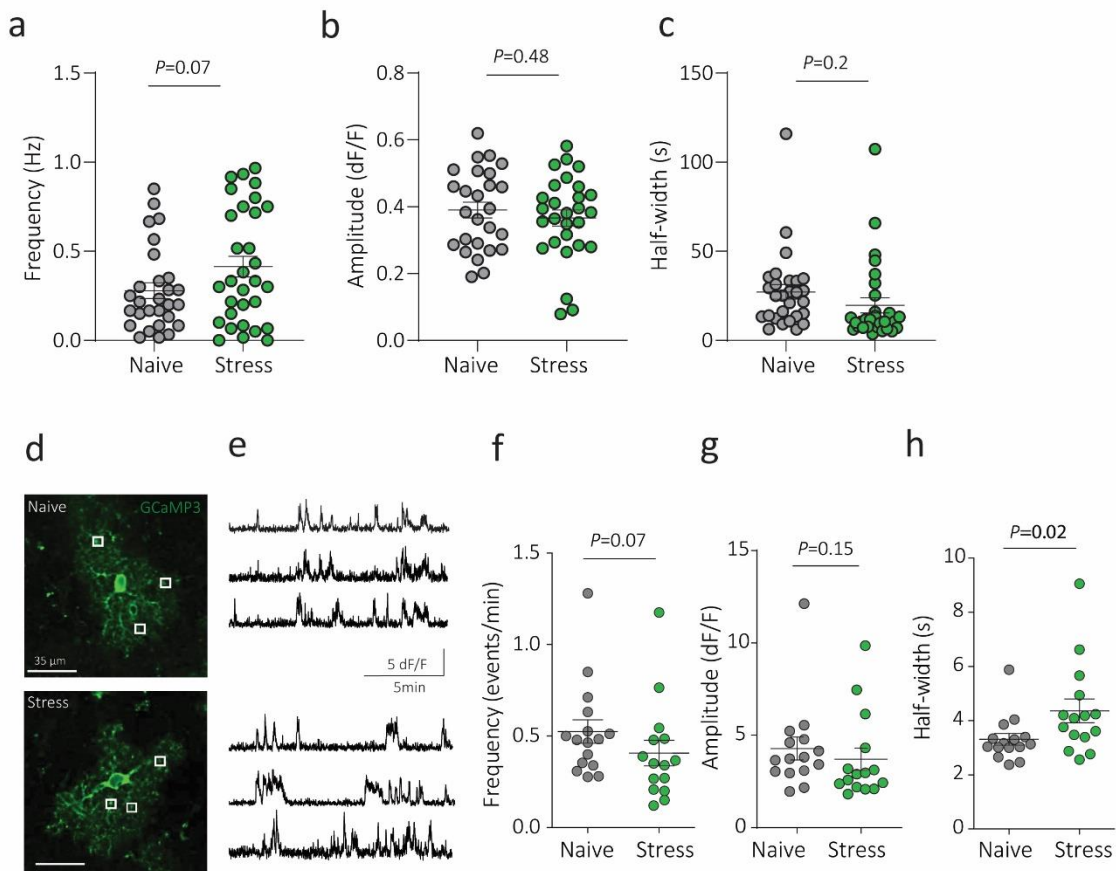

**(a)** No effect of stress on the frequency of calcium events in astrocyte soma in *Aldh1l1-GCaMP6s* mice.  $n=3$  mice,  $n=24$  cells. Error bars: mean $\pm$ s.e.m. Unpaired t-test,  $P=0.07$ . **(b)** No effect of stress on the amplitude of calcium events in astrocyte soma in *Aldh1l1-GCaMP6s* mice.  $n=3$  mice,  $n=24$  cells. Error bars: mean $\pm$ s.e.m. Unpaired t-test,  $P=0.48$ . **(c)** No effect of stress on the duration (half-width) of calcium events in astrocyte soma in *Aldh1l1-GCaMP6s* mice.  $n=3$  mice,  $n=24$  cells. Error bars: mean $\pm$ s.e.m. Unpaired t-test,  $P=0.2$ . **(d)** Representative images of GCaMP3-expressing astrocytes in naïve and stress conditions. Scale bar 35 $\mu$ m. **(e)** Representative raw traces of calcium activity in naïve (top) and stress (bottom) Scale bars 5df/f and 5min. **(f)** Scatter dot plot comparing frequency of calcium events between naïve ( $n=3$  mice,  $n=15$  cells) and stress ( $n=3$  mice,  $n=15$  cells) conditions. Error bars: mean $\pm$ s.e.m. Mann-Whitney U. **(g)** Scatter dot plot comparing the effects of stress on the amplitude of individual calcium events. Error bars: mean $\pm$ s.e.m. Mann-Whitney U. **(h)** Scatter dot plot comparing half-width of individual calcium events between naïve and stress. Error bars: mean $\pm$ s.e.m. Mann-Whitney U.

### Supplementary Figure 3

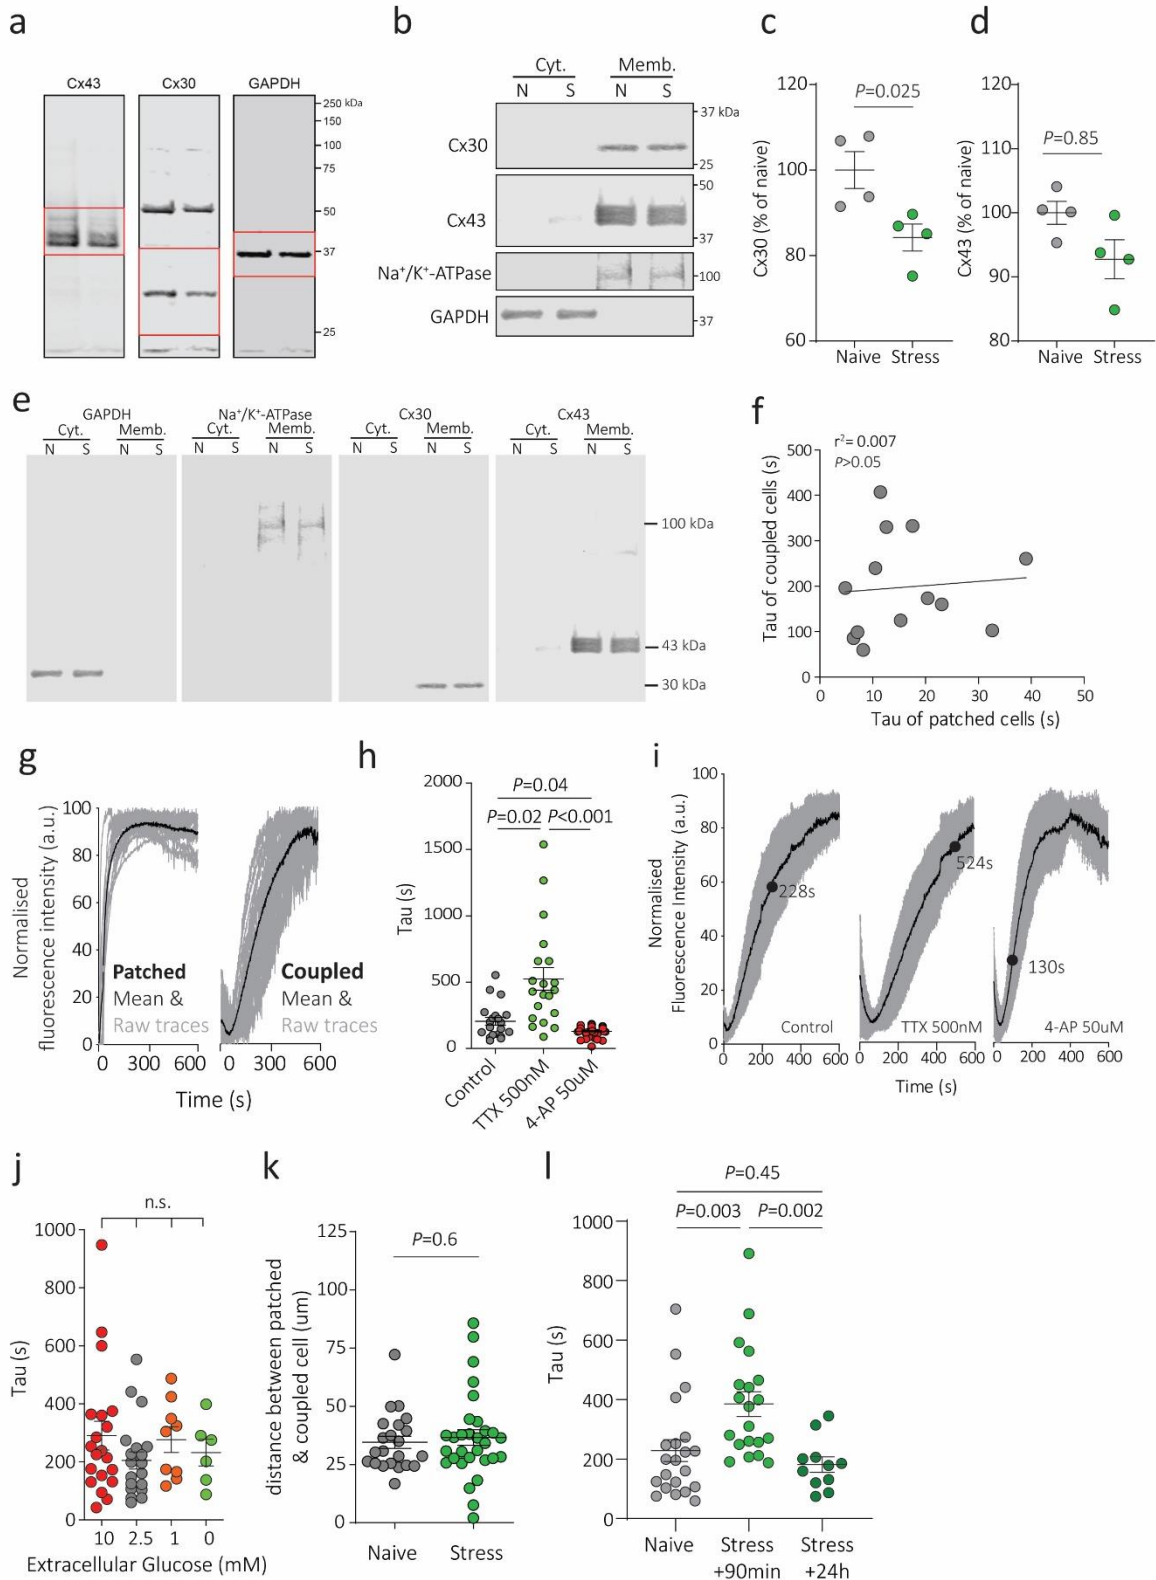

**(a)** Full-length blots. Red box indicates cropped data represented in Fig. 3 a-c. **(b)** Representative blots depicting enrichment of membrane fractions following a membrane

enrichment protocol from cortices of naïve and stressed mice. Anti-Na/K-ATPase antibody was used to validate membrane enrichment. **(c)** Protein expression of Cx30 in the membrane fraction was significantly reduced after stress. n=4 mice per group. Error bars: mean±s.e.m. Unpaired t-test. **(d)** Protein expression of Cx43 in the membrane fraction was not changed after stress. n=4 mice per group. Error bars: mean±s.e.m. Unpaired t-test. **(e)** Full-length blots of membrane fractionation data. **(f)** No correlation exists between tau of patched and coupled cells (n=7 mice, n=13 pairs of cells). Pearson's correlation coefficient. **(g)** Raw (grey) and average (black) traces of dye filling in patched (left) and coupled (right) astrocytes. **(h)** Astrocyte coupling bi-directionally responds to neuronal activity (Control tau=228.6±36.9s, n=6 mice, n=21 cells; TTX tau=524.6±84.7s, n=3 mice, n=20 cells; 4-AP tau=130.4±5.7s, n=9 mice, n=42 cells; mean±s.e.m.). Error bars: mean±s.e.m. One-way ANOVA. **(i)** Mean trace of coupling in each group with tau value indicated. Error indicates standard deviation. **(j)** No effect of acute modifications in extracellular glucose concentration. 10mM n=20cells tau=290.1±49.5s; 2.5mM n=21 cells, tau=228.6±36.9s; 1mM n=9 cells, tau=276.5±44.2s; 0mM n=6 cells, tau=231.8±46.1s, mean±sem; Error bars: mean±s.e.m. one-way anova with Tukey's multiple comparison test.  $F(3,52)=0.467$ ,  $P=0.71$ . **(k)** No effect of stress on the mean distance between patched and coupled cells. Naïve - n=22 pairs of cells, mean distance=34.5±2.6µm; Stress - n=30 pairs of cells, mean distance=36.6±3.4µm, mean±s.e.m. Error bars: mean±s.e.m. Mann-Whitney test,  $U=300.5$ ,  $df=50$ ,  $P=0.6$ . **(l)** The effects of acute stress on astrocyte coupling is transient. One-way ANOVA  $F=7.19$   $P=0.0018$ . Naïve: n=21cells tau=228.6±36.9s; Stress+90min: n=20 cells, tau=385.1±42s; Stress+24h: n=11cells, tau=182.2±26s, mean±s.e.m. Error bars: mean±s.e.m.

## Supplementary Figure 4

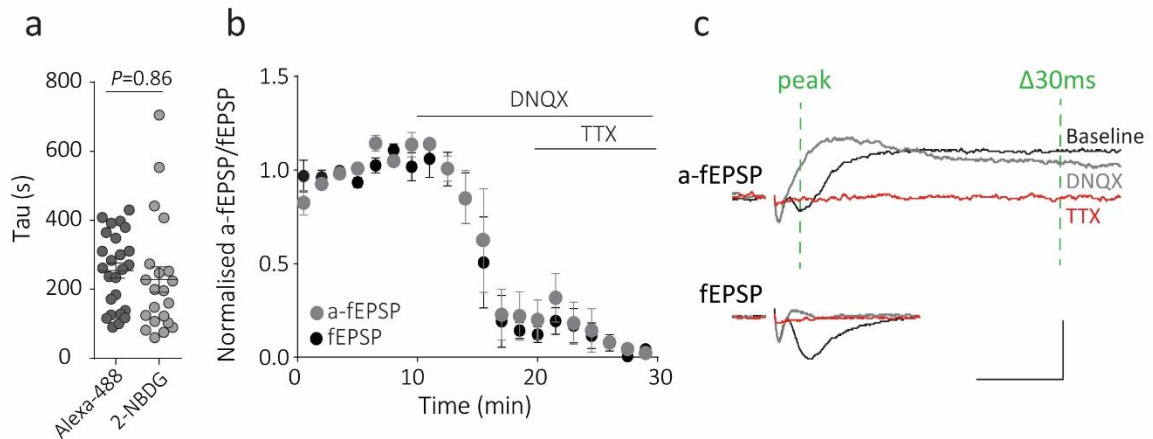

**(a)** No difference in dye coupling between astrocytes when using either Alexa-488 ( $\tau=254.5\pm 21.9\text{s}$ ;  $n=7$  mice,  $n=25$  cells) or 2-NBDG ( $\tau=228.6\pm 36.9\text{s}$ ;  $n=6$  mice,  $n=21$  cells; Mann-Whitney  $U=242$ ,  $P=0.86$ ). Error bars: mean $\pm$ s.e.m. **(b)** Normalized fEPSP and a-fEPSP demonstrating the sensitivity to DNQX ( $50\mu\text{M}$ ) and TTX ( $1\mu\text{M}$ ;  $n=2$  mice,  $n=3$  cells). Error bars: mean $\pm$ s.e.m. **(c)** Example traces of a-fEPSP and fEPSPs in baseline, DNQX, and TTX. Scale bars:  $0.5\text{mV}$ ,  $10\text{ms}$ .

# Supplementary Figure 5

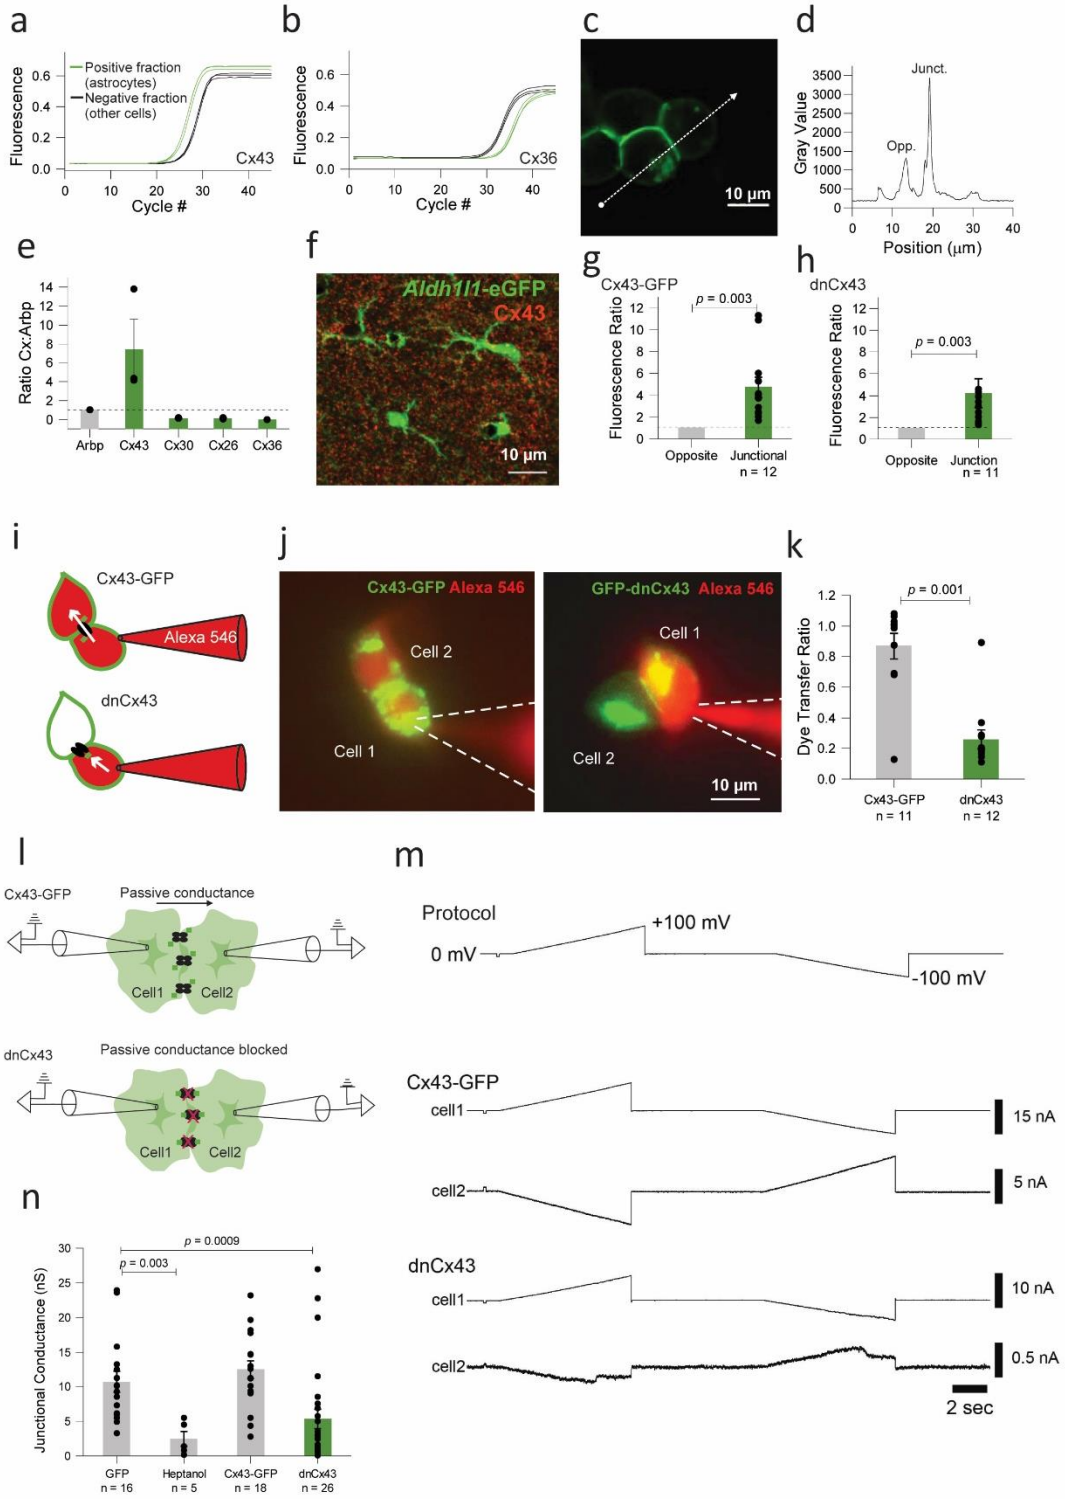



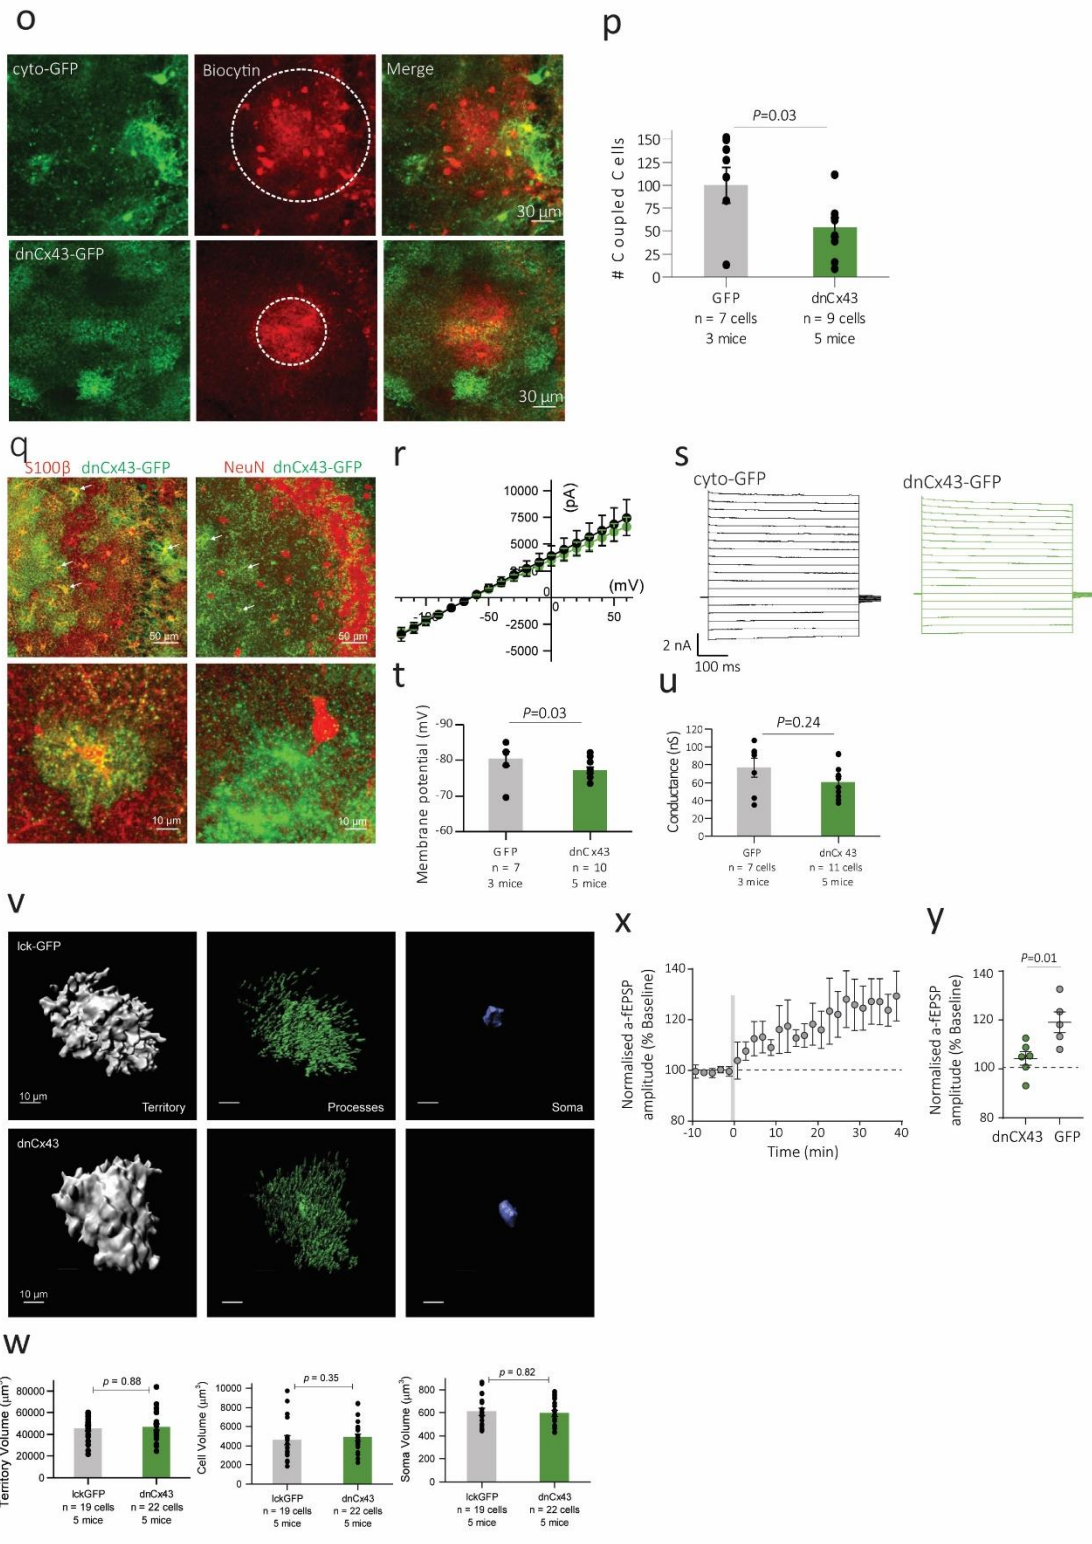

(a) Enrichment of Cx43 in astrocyte fractions compared to other cell types as assessed by qPCR. (b) Lack of enrichment of Cx36, a neuronal connexin, in astrocyte fractions compared to other cell types as assessed by qPCR. (c) dnCx43, expressed in HEK293 cells, traffics to junctional membranes. (d) Representative image depicting increased trafficking of dnCx43 to junctional membranes as assessed by fluorescence due to GFP expression. (e) Enrichment ratio of Cx43, Cx30, Cx26, and Cx36 to the housekeeping gene Arbp in astrocyte fractions following qPCR.

Error bars: mean±s.e.m. **(f)** Immunohistochemical images of Cx43 antibodies in Aldh1l1-GFP mice. **(g)** Quantification of the ratio of junctional to opposite membrane fluorescence in HEK293 cells expressing a non-dnCx43-GFP. Unpaired t-test. Error bars: mean±s.e.m. **(h)** Quantification of the ratio of junctional to opposite membrane fluorescence in HEK293 cells expressing dnCx43. Error bars: mean±s.e.m. Unpaired t-test. **(i)** Schematic representation of dye coupling experiments in cells expressing Cx43-GFP and dnCX43. **(j)** Representative images depicting impairment of dye flux between cells expressing dnCX43 compared to control (Cx43-GFP). **(k)** Quantification of dye coupling in cells expressing Cx43-GFP and dnCX43. Mann-Whitney U test. Error bars: mean±s.e.m. **(l)** Schematic representation of electrical conductance experiments carried out by patching two coupled astrocytes and measuring conductance mediated by gap-junction channels **(m)** *Top* – protocol of electrical conductance experiment. *Middle* – Representative traces demonstrating robust passive electrical conductance between astrocytes in cells expressing control virus (Cx43-GFP). *Bottom* – Representative traces demonstrating impaired passive electrical conductance between astrocytes expressing dnCX43. **(n)** Quantification of passive electrical coupling between astrocytes in control (GFP expressing astrocytes), in the presence of gap-junction channel blocker heptanol, in Cx43-GFP expressing astrocytes, and astrocytes expressing dnCX43. One-way ANOVA. Error bars: mean±s.e.m. **(o)** Representative images of astrocyte syncytial filling experiments. *Top* – Extensive syncytial filling in astrocytes expressing cytosolic-GFP (control virus). *Bottom* – Size of astrocytic network is reduced when cells express dnCX43. **(p)** Quantification of astrocyte network size (number of coupled cells in control (GFP) and dnCX43 expressing astrocytes. Unpaired t-test. Error bars: mean±s.e.m. **(q)** Immunostaining showing colocalization of CX43-GFP with astrocyte specific marker S100B (*left panels*) but no colocalization with neuronal marker NeuN (*right*). **(r)** Average current-voltage relationships (IV curves) in astrocytes expressing dnCx43 (green), or a control virus (GFP, black). **(s)** Representative traces of responses to voltage steps in astrocytes expressing either dnCx43 (green), or a control virus (GFP, black). **(t)** Astrocytes expressing dnCx43 (green) rest at a slightly depolarized resting membrane potential as compared to those expressing the control virus (GFP, gray). Unpaired t-test. Error bars: mean±s.e.m. **(u)** Astrocytes expressing dnCx43 (green) display no change in conductance when compared to those expressing the control virus (GFP, gray). Unpaired t-test. Error bars: mean±s.e.m. **(v)** Single astrocyte morphology assessed in control (lck-GFP) and dominant-negative Cx43-expressing astrocytes. Scale bar 10um. **(w)** Expression of dnCX43 does not affect astrocyte morphology. Unpaired t-tests. Error bars: mean±s.e.m. **(x)** Normalized a-fEPSP amplitude of LTP recorded through astrocytes virally expressing eGFP. Error bars: mean±s.e.m. **(y)** Comparison of LTP in dnCX43 and GFP (control) expressing astrocytes. Demonstrating minimal impact of GFP expression on synaptic plasticity. Unpaired t-test,  $P=0.01$ . Error bars: mean±s.e.m.



## Supplementary Figure 6

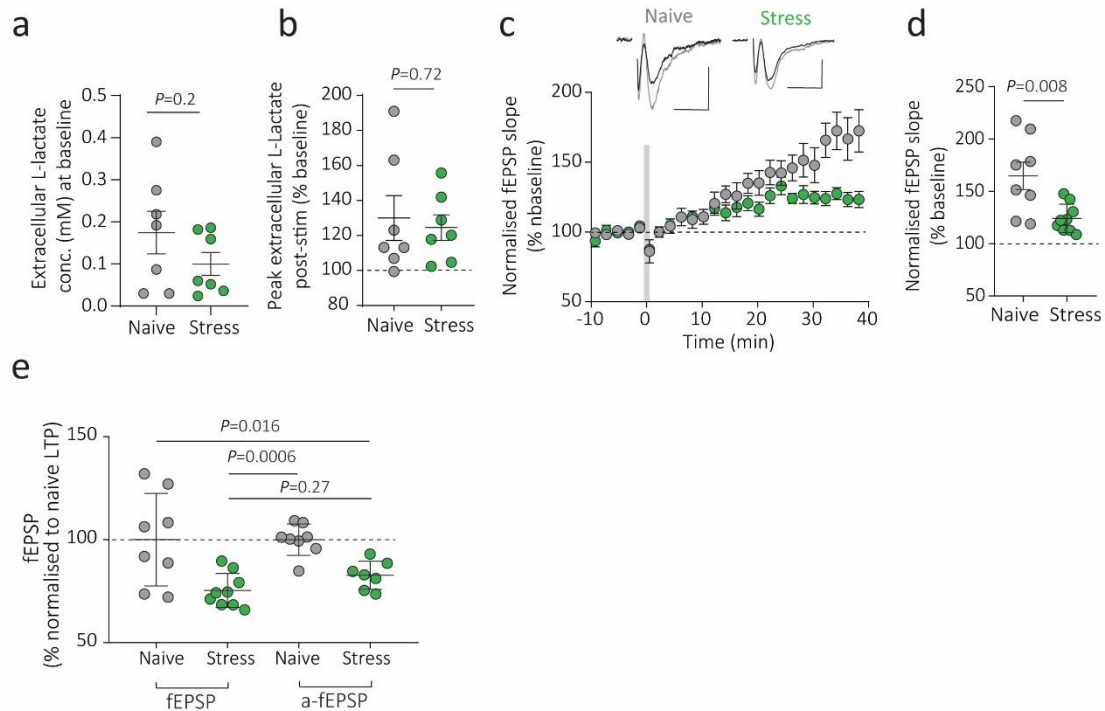

**(a)** No difference in basal extracellular L-lactate concentration was observed using enzymatic probes. Naive:  $n=3$  mice,  $n=7$  brain slices,  $L\text{-lac}=0.18\pm 0.05\text{mM}$ ; Stress:  $n=3$  mice,  $n=7$  brain slices,  $L\text{-lac}=0.099\pm 0.03$ ; Unpaired t-test,  $t=1.3$ ,  $df=12$ ,  $P=0.22$ . Error bars:  $\text{mean}\pm\text{s.e.m.}$  **(b)** Scatter dot plot depicting peak extracellular L-lactate immediately after theta burst stim in naive and stress conditions. Naive -  $130\pm 12.8\%$ , Stress -  $124.5\pm 7.3\%$ ; Unpaired t-test,  $t=0.37$ ,  $df=12$ ,  $P=0.72$ . Error bars:  $\text{mean}\pm\text{s.e.m.}$  **(c)** fEPSP recordings from neocortex demonstrating impaired LTP following a single bout of acute swim stress. Grey vertical bar denotes 10s theta burst stim. Error bars:  $\text{mean}\pm\text{s.e.m.}$  *Inset* average traces of fEPSP at baseline and 30-40min following theta burst stim. Scale bars depict 0.25mV and 10ms. **(d)** Comparison of LTP between naive and stress group. Each point is the average of the 30-40min time period from each recording. Error bars:  $\text{mean}\pm\text{s.e.m.}$  **(e)** Comparison of LTP (normalized to Naïve LTP) recorded by classical extracellular fEPSP compared with intracellular a-fEPSP. fEPSP – naive= $100\pm 7.9\%$ , stress= $75.3\pm 2.7\%$ ; a-fEPSP – naive= $100\pm 2.7\%$ , stress= $82.8\pm 2.6\%$   $\text{mean}\pm\text{s.e.m.}$  Error bars:  $\text{mean}\pm\text{s.e.m.}$

## Supplementary Methods

**Preparation of brain slices for electrophysiology.** Briefly, mice were anesthetized with inhalant isoflurane, quickly decapitated and the brain was removed and sectioned at 300-350  $\mu\text{m}$  (DSK Zero-1 microslicer) in ice-cold sucrose slicing buffer containing (in mM) 194 sucrose, 30 NaCl, 4.5 KCl, 1.2  $\text{NaH}_2\text{PO}_4$ , 26  $\text{NaHCO}_3$ , 10 D-glucose, 1  $\text{MgCl}_2$ . Sections were maintained in an interface style holding chamber containing aCSF (in mM; 124 NaCl, 4.5 KCl, 1.2  $\text{NaH}_2\text{PO}_4$ , 26  $\text{NaHCO}_3$ , 10 D-glucose, 2  $\text{CaCl}_2$ , 1  $\text{MgCl}_2$ , saturated with 95%  $\text{O}_2$ , 5%  $\text{CO}_2$ ) at  $\sim 33^\circ\text{C}$  for 30 min following slicing and then at room temperature for patch-clamp experiments, and at  $\sim 33^\circ\text{C}$  continually for LFP recordings. To confirm virus expression, sections were postfixed in 10% formalin for 24 hours and then either mounted immediately (tdT) or immunolabeled for GFP following the protocol listed above (dnCx43, cyto-GFP, Ick-GFP) before mounting. Sections were imaged with 5X magnification on an upright epifluorescence microscope (Zeiss).

**Whole cell electrophysiological recordings.** Whole cell patch-clamp recordings were made from astrocytes using borosilicate pipettes pulled to a resistance of 4-6  $\text{M}\Omega$  and filled either with K-gluconate intracellular solution (in mM; 135 K-gluconate, 3 KCl, 10 HEPES, 1 EGTA, 0.1  $\text{CaCl}_2$ , 4 Mg-ATP, 0.3 Na-ATP, 8  $\text{Na}_2$ -phosphocreatine), KCl intracellular (in mM; 138 KCl, 10 HEPES, 1 EGTA, 0.1  $\text{CaCl}_2$ , 4 Mg-ATP, 0.3 Na-ATP, 8  $\text{Na}_2$ -phosphocreatine), or Cs-methanesulfonate intracellular (in mM; 120  $\text{CsMeSO}_3$ , 15 CsCl, 8 NaCl, 10 HEPES, 0.2 EGTA, 0.1  $\text{CaCl}_2$ , 2 Mg-ATP, 0.3 Na-ATP, 10 TEA-Cl). For all whole-cell recordings, only cells with access resistance below 20  $\text{M}\Omega$  were kept. Cells were visualized using DIC on an Olympus BX50WI microscope with a 40X objective. Signals were recorded using a Multiclamp amplifier (700A, Molecular Devices) and a Digidata digitizer (1322A, Molecular Devices), with Clampex 9 software. Current clamp experiments were recorded at resting membrane voltage, with the exception of a ramp from -180 to 60 pA to determine rheobase.
