# Supplementary material for: Stress gates an astrocytic energy reservoir to impair synaptic plasticity
Source: PubMed Central journal article supplement (PMC7181611; doi:10.1038/s41467-020-15778-9), 2020-04-24
Supplement: 41467_2020_15778_MOESM2_ESM.pdf [file 41467_2020_15778_MOESM2_ESM.pdf]

Editorial Note: This manuscript has been previously reviewed at another journal that is not operating a transparent peer review scheme. The manuscript was considered suitable for publication without further review at Nature Communications.
